# Supplementary material for: Thermodynamic Balance vs. Computational Fluid Dynamics Approach for the Outlet Temperature Estimation of a Benchtop Spray Dryer
Source: MDPI journal article supplement (doi:10.3390/pharmaceutics14020296), 2022-01-27
Supplement: s1 [file s1]

# Supplementary Materials: Thermodynamic Balance vs. Computational Fluid Dynamics Approach for the Outlet Temperature Estimation of a Benchtop Spray Dryer

Andrea Milanesi , Francesco Rizzuto , Maurizio Rinaldi , Andrea Foglio Bonda , Lorena Segale  and Lorella Giovannelli \* 

**Proof.** To obtain Equation (6) it is possible to start from  $Q_{\text{feed}}$  (S1) and  $Q_{\text{loss}}$  (S2):

$$Q_{\text{feed}}(T_{\text{in}}, T_{\text{ext}}, RH_{\text{ext}}, FR, c_{\text{feed}}) = (FR \cdot (1 - c_{\text{feed}})) \cdot (H_{\text{evap}}(T_{\text{ext}}) + c p_{\text{feed}}(T_{\text{in}}) \cdot (T_{\text{wetbulb}}(T_{\text{ext}}, RH_{\text{ext}}) - T_{\text{ext}})) \quad (\text{S1})$$

(see Lisboa et al. [1])

$Q_{\text{loss}}$  as reported by Çengel [2] can be decomposed as:

$$Q_{\text{loss}}(T_{\text{in}}, T_{\text{ext}}, T_{\text{ext}}^{\text{wall}}, T_{\text{out}}, G_{\text{in}}^{\text{m}}) = Q_{\text{loss}}^{\text{R}}(T_{\text{in}}, T_{\text{ext}}, T_{\text{out}}, G_{\text{in}}^{\text{m}}) + Q_{\text{loss}}^{\text{rad}}(T_{\text{ext}}^{\text{wall}}, T_{\text{ext}}) \quad (\text{S2})$$

where:

$$Q_{\text{loss}}^{\text{R}}(T_{\text{in}}, T_{\text{ext}}, T_{\text{out}}, G_{\text{in}}^{\text{m}}) = \frac{T_{\text{in}} - T_{\text{ext}}}{R(T_{\text{in}}, T_{\text{out}}, G_{\text{in}}^{\text{m}})} \cdot \text{Tower}_{\text{length}} \quad (\text{S3})$$

$$Q_{\text{loss}}^{\text{rad}}(T_{\text{ext}}^{\text{wall}}, T_{\text{ext}}) = K \cdot (T_{\text{ext}}^{\text{wall}^4} - T_{\text{ext}}^4) \quad (\text{S4})$$

$$K = \text{Area}_{\text{ext}} \cdot \sigma \cdot \text{emissivity}_{\text{glass}} \quad (\text{S5})$$

It is possible to obtain Equation (6) in 4 steps:

1.  $Q_{\text{loss}}$  can be substituted in Equation (5) with Equation (S2) getting:

$$T_{\text{out}} = T_{\text{in}} - \frac{Q_{\text{feed}} + Q_{\text{loss}}^{\text{R}} + Q_{\text{loss}}^{\text{rad}}}{c p_{\text{gas}} \cdot G_{\text{in}}} \quad (\text{S6})$$

2.  $Q_{\text{loss}}^{\text{rad}}$  can be deduced from Equation (S6)

$$Q_{\text{loss}}^{\text{rad}} = (T_{\text{in}} - T_{\text{out}}) \cdot c p_{\text{gas}} \cdot G_{\text{in}} - Q_{\text{feed}} - Q_{\text{loss}}^{\text{R}} \quad (\text{S7})$$

3.  $Q_{\text{loss}}^{\text{rad}}$  equation (S4) can be inverted to find  $T_{\text{ext}}^{\text{wall}}$

$$T_{\text{ext}}^{\text{wall}} = \left( \frac{Q_{\text{loss}}^{\text{rad}}}{K} + T_{\text{ext}}^4 \right)^{1/4} \quad (\text{S8})$$

4. And finally it is possible to substitute  $Q_{\text{loss}}^{\text{rad}}$  of (S7) in (S8) getting:

$$T_{\text{ext}}^{\text{wall}} = \left( \frac{(T_{\text{in}} - T_{\text{out}}) \cdot c p_{\text{gas}} \cdot G_{\text{in}} - Q_{\text{feed}} - Q_{\text{loss}}^{\text{R}}}{K} + T_{\text{ext}}^4 \right)^{1/4} \quad (\text{S9})$$

On the  $T_{\text{ext}}^{\text{wall}}$  values can be apply the ML.

□

## References

1. Lisboa, H.M.; Duarte, M.E.; Cavalcanti-Mata, M.E. Modeling of food drying processes in industrial spray dryers. *Food Bioprod. Process.* **2018**, *107*, 49–60.
2. Çengel, Y.A. Introduction to Thermodynamics and Heat Transfer; Çengel series in engineering for the thermal-fluid sciences. McGraw-Hill: New York, NY, USA, 2009.
